# Supplementary material for: Age-Related Associations of Altruism with Attitudes towards COVID-19 and Vaccination: A Representative Survey in the North of Italy
Source: MDPI journal article supplement (doi:10.3390/bs13020188), 2023-02-19
Supplement: s1 [file s1]

---

*Supporting Material*

# **Age-Related Associations of Altruism with Attitudes toward COVID-19 and Vaccination: A Representative Survey in the North of Italy**

Verena Barbieri, Christian J. Wiedermann, Stefano Lombardo, Barbara Plagg, Giuliano Piccoliori, Timon Gärtner, and Adolf Engl

**Table S1.** Medians and 1<sup>st</sup> and 3<sup>rd</sup> quartiles of altruism sums scores for demographic characteristics of the sample by age groups

| Variable                     | Altruism sum score |                   |                              |                   |                   |                                  |                      |                   |                                  |                      |
|------------------------------|--------------------|-------------------|------------------------------|-------------------|-------------------|----------------------------------|----------------------|-------------------|----------------------------------|----------------------|
|                              | Overall            |                   |                              | Age 18 – 69 years |                   |                                  | Age 70 years or more |                   |                                  |                      |
|                              | N<br>(%)           | Median<br>[1Q;3Q] | <i>p</i> -value <sup>†</sup> | N<br>(%)          | Median<br>[1Q;3Q] | <i>p</i> -<br>value <sup>†</sup> | N<br>(%)             | Median<br>[1Q;3Q] | <i>p</i> -<br>value <sup>†</sup> | <i>p</i> -<br>value* |
| Total                        | 1,426<br>(100)     | 24<br>[20;26]     | ---                          | 1,169<br>(100)    | 23<br>[20;26]     | ---                              | 257<br>(100)         | 24<br>[20;27]     | ---                              | < 0.05               |
| Gender                       |                    |                   | < 0.001                      |                   |                   | < 0.001                          |                      |                   | <0.05                            |                      |
| Male                         | 692<br>(48.5)      | 22<br>[19;25]     |                              | 581<br>(49.7)     | 22<br>[19;25]     |                                  | 110<br>(42.8)        | 23<br>[19.1;26]   |                                  | n.s.                 |
| Female                       | 734<br>(51.5)      | 25<br>[21;27]     |                              | 588<br>(50.3)     | 25<br>[21;27]     |                                  | 147<br>(57.2)        | 25<br>[21;28]     |                                  | n.s.                 |
| Education                    |                    |                   | n.s.                         |                   |                   | n.s.                             |                      |                   | n.s.                             |                      |
| Middle school or lower       | 316<br>(22.2)      | 24<br>[20;27]     |                              | 182<br>(15.6)     | 24<br>[20;27]     |                                  | 134<br>(52.3)        | 24<br>[19;27]     |                                  | n.s.                 |
| Vocational school            | 411<br>(28.8)      | 23<br>[20;26]     |                              | 348<br>(29.8)     | 23<br>[19;26]     |                                  | 63<br>(24.6)         | 25<br>[20;28.5]   |                                  | < 0.05               |
| High school                  | 411<br>(28.8)      | 23.5<br>[20;26]   |                              | 371<br>(31.8)     | 23<br>[20;26]     |                                  | 39<br>(15.2)         | 25.5<br>[22;28.5] |                                  | < 0.01               |
| University                   | 288<br>(20.1)      | 24<br>[21;26.5]   |                              | 267<br>(22.9)     | 24<br>[21;26]     |                                  | 20<br>(7.8)          | 23<br>[21;26.3]   |                                  | n.s.                 |
| Citizenship                  |                    |                   | <0.01                        |                   |                   | <0.01                            |                      |                   | n.s.                             |                      |
| Italian                      | 1308<br>(91.7)     | 24<br>[20;26]     |                              | 1058<br>(91.6)    | 23<br>[20;26]     |                                  | 249<br>(97)          | 24<br>[20;27]     |                                  | < 0.01               |
| Other                        | 118<br>(8.3)       | 25<br>[20;27.5]   |                              | 110<br>(9.4)      | 25<br>[20;27]     |                                  | 8 (3.0)              | 27.2<br>[21;30]   |                                  | n.s.                 |
| Native Language <sup>‡</sup> |                    |                   | n.s.                         |                   |                   | <0.05                            |                      |                   | n.s.                             |                      |
| German                       | 879<br>(61.7)      | 24<br>[20;27]     |                              | 722<br>(61.8)     | 2<br>[20;26]      |                                  | 156<br>(61.0)        | 24<br>[20;27.2]]  |                                  | < 0.01               |
| Italian                      | 384<br>(26.9)      | 23<br>[20;26]     |                              | 294<br>(25.2)     | 24<br>[20;27]     |                                  | 90<br>(34.9)         | 24<br>[20;27]     |                                  | n.s.                 |
| Ladin                        | 57<br>(4.0)        | 23<br>[20;28.4]   |                              | 48<br>(4.1)       | 23<br>[20.6;27.1] |                                  | 9 (3.5)              | 27<br>[20;30]     |                                  | n.s.                 |

|                                                                    |                 |                 |         |                |                 |         |               |                   |        |        |
|--------------------------------------------------------------------|-----------------|-----------------|---------|----------------|-----------------|---------|---------------|-------------------|--------|--------|
| Other/more than one                                                | 106<br>(7.4)    | 24.3<br>[20;27] |         | 104<br>(8.9)   | 25<br>[20;27]   |         | 1<br>(0.6)    | 22<br>[22;22]     |        | n.s.   |
| Household / Family<br>structure (more than one<br>answer possible) |                 |                 |         |                |                 |         |               |                   |        |        |
| Single                                                             | 236<br>(16.6)   | 24<br>[20;27.5] | 0.012   | 151<br>(12.9)  | 23.3<br>[20;28] | n.s.    | 85<br>(33.1)  | 24.4<br>[20;27.2] | n.s.   | n.s.   |
| Children 0-17 years of age                                         | 405<br>(28.4)   | 24<br>[20;27]   | n.s.    | 400<br>(34.2)  | 24<br>[26;26]   | n.s.    | 5<br>(1.8)    | 27<br>[12;29]     | n.s.   | n.s.   |
| COVID-19 patient at risk <sup>2</sup>                              | 302<br>(21.2)   | 24<br>[21;27]   | 0.047   | 186<br>(15.9)  | 24<br>[21;27]   | n.s.    | 115<br>(44.9) | 25<br>[21;27]     | n.s.   | n.s.   |
| None of the above                                                  | 522<br>(36.7)   | 2<br>[20;26]    | 0.030   | 469<br>(40.1)  | 23<br>[20;26]   | n.s.    | 53<br>(20.8)  | 22<br>[19;26]     | < 0.05 | n.s.   |
| Working in the health sector                                       |                 |                 | < 0.001 |                |                 | < 0.001 |               |                   | n.s.   |        |
| Yes                                                                | 85<br>(5.9)     | 25<br>[22;27]   |         | 83<br>(7.1)    | 25<br>[22;27]   |         | 2<br>(0.6)    | 27<br>[n.a.]      |        | n.s.   |
| No                                                                 | 1,341<br>(94.1) | 23<br>[20;26]   |         | 1086<br>(92.9) | 23<br>[20;26]   |         | 255<br>(99.4) | 24<br>[20;27]     |        | <0.01  |
| Chronic disease(s)                                                 |                 |                 | < 0.001 |                |                 | 0.010   |               |                   | < 0.05 |        |
| Yes                                                                | 246<br>(17.3)   | 25<br>[21;28]   |         | 141<br>(12.0)  | 24<br>[21;28]   |         | 106<br>(41.2) | 25<br>[20;28]     |        | n.s.   |
| No                                                                 | 1,179<br>(82.7) | 23<br>[20;26]   |         | 1028<br>(88.0) | 23<br>[20;26]   |         | 151<br>(58.8) | 24<br>[20;27]     |        | n.s.   |
| COVID-19 infected                                                  |                 |                 | n.s.    |                |                 | n.s.    |               |                   | n.s.   |        |
| Yes                                                                | 252<br>(17.7)   | 23<br>[26;26]   |         | 218<br>(18.7)  | 23<br>[20;26]   |         | 33<br>(13.0)  | 20<br>[15.9;25.1] |        | < 0.05 |
| No                                                                 | 1,174<br>(82.3) | 24<br>[20;27]   |         | 950<br>(81.3)  | 24<br>[20;26]   |         | 223<br>(87.0) | 25<br>[21;27]     |        | < 0.01 |
| Economic situation (last 3<br>months)                              |                 |                 | n.s.    |                |                 | n.s.    |               |                   | n.a.   |        |

|                       |                 |                     |               |                   |               |                 |        |
|-----------------------|-----------------|---------------------|---------------|-------------------|---------------|-----------------|--------|
| Better                | 43<br>(3.0)     | 24<br>[20;26]       | 42<br>(3.6)   | 24<br>[19.5;26]   | 1<br>(0.6)    | 27<br>[n.a.]    | n.s.   |
| The same              | 973<br>(68.2)   | 24<br>[20;27]       | 751<br>(64.3) | 24<br>[20;26]     | 222<br>(86.4) | 25<br>[20;27]   | < 0.05 |
| Worse                 | 375<br>(26.3)   | 23<br>[20;26]       | 346<br>(29.6) | 23<br>[20;26.8]   | 29<br>(11.3)  | 23<br>[22;25]   | n.s.   |
| Don't know            | 35<br>(2.4)     | 21.6<br>[17.4;25.2] | 30<br>(2.6)   | 22<br>[17.7;24.8] | 5<br>(1.8)    | 18<br>[13;30]   | n.s.   |
| Urban/rural residency | 0.046           |                     | 0.047         |                   | n.s.          |                 |        |
| Urban                 | 602<br>(42.2)   | 24<br>[20;27]       | 487<br>(41.7) | 24<br>[20;27]     | 114<br>(44.5) | 25<br>[20;27]   | n.s.   |
| Rural                 | 824<br>(57.8)   | 23<br>[20;26]       | 681<br>(58.3) | 23<br>[20;26]     | 142<br>(55.5) | 24<br>[20;27]   | < 0.05 |
| Vaccine hesitancy     | n.s.            |                     | n.s.          |                   | n.s.          |                 |        |
| Hesitant              | 222<br>(15.6)   | 23<br>[20;27]       | 208<br>(17.8) | 24<br>[20;26]     | 14<br>(5.3)   | 23<br>[20.6;27] | n.s.   |
| Non-hesitant          | 1,204<br>(84.4) | 24<br>[20;26]       | 961<br>(82.2) | 23<br>[19;27]     | 243<br>(94.7) | 24<br>[20;27]   | < 0.05 |

<sup>†</sup> *p*-values refer to Man Whitney-test and Kruskal-Wallis-Test, respectively to baseline characteristic groups for altruism.

<sup>\*</sup> *p*-values refer to Chi-Square-Test and compare baseline characteristics for differences between age groups.

<sup>‡</sup> Participants living together with a COVID-19 patient at risk in one household.

n.a., not available.

**Table S2.** Spearman correlation coefficients between altruism and attributes of the sample towards opinions about SARS-CoV-2 and SARS-CoV-2 vaccination

| Survey item                                                                                                   | Correlations with altruism <sup>†</sup> |             |                  |
|---------------------------------------------------------------------------------------------------------------|-----------------------------------------|-------------|------------------|
|                                                                                                               | Total                                   | 18–69 years | 70 years or more |
| <b>Do you agree with the decisions taken by the authorities?</b>                                              |                                         |             |                  |
| Do you agree with the decisions taken by the authorities to increase the coverage of COVID-19 vaccinations?   | 0.160 ***                               | 0.119 ***   | 0.269 *          |
| Do you agree with the decisions taken by the authorities to increase the coverage of compulsory vaccinations? | 0.161 ***                               | 0.103 **    | 0.258 ***        |
| Do you agree with the decisions taken by the authorities regarding COVID-19?                                  | 0.148 ***                               | 0.125 ***   | 0.261 **         |
| <b>Do you support the following actual restrictions regarding COVID-19 ?</b>                                  |                                         |             |                  |
| Mandatory face masks in closed public rooms                                                                   | 0.188 ***                               | 0.212 ***   | n.s.             |
| Mandatory face masks in the open air                                                                          | 0.134 ***                               | 0.138 ***   | n.s.             |
| Distance learning in parts for scholars from 14 to 19                                                         | n.s.                                    | n.s.        | n.s.             |
| Distance learning in parts for scholars from 6 to 14                                                          | n.s.                                    | n.s.        | n.s.             |
| Restricted opening hours for bars and restaurants                                                             | 0.112 ***                               | 0.105 **    | 0.125 *          |
| Distance rules in closed public rooms                                                                         | 0.183 ***                               | 0.197 ***   | n.s.             |
| Distance rules in the open air                                                                                | 0.149 ***                               | 0.164 ***   | n.s.             |
| Restrictions on not individual physical and sports activities                                                 | 0.057 *                                 | n.s.        | n.s.             |
| Closure of national borders                                                                                   | 0.071 *                                 | n.s.        | 0.124 *          |
| Closure of regional borders                                                                                   | 0.119 ***                               | 0.113 ***   | n.s.             |
| Compulsory self-isolation after contact with infected persons                                                 | 0.218 ***                               | 0.228 ***   | 0.126 *          |
| As much smart working as possible                                                                             | 0.090 **                                | 0.086 **    | n.s.             |
| Lockdown                                                                                                      | 0.069 *                                 | n.s.        | 0.127 *          |
| Total distance learning                                                                                       | n.s.                                    | n.s.        | n.s.             |
| Prohibition of visiting friends and parents not living in the same household                                  | 0.089 **                                | 0.079 *     | n.s.             |
| Closure of communal borders                                                                                   | n.s.                                    | n.s.        | n.s.             |
| Closure of hotels                                                                                             | 0.091 **                                | 0.073 *     | n.s.             |
| Limitation of individual physical or sportive activities                                                      | -0.092 **                               | -0.112 ***  | n.s.             |
| <b>Did you take the following measure within the last 7 day to avoid a COVID-19 infection?</b>                |                                         |             |                  |
| Washing my hands often with water and soap for 20 seconds                                                     | 0.255 ***                               | 0.259 ***   | 0.224 ***        |
| Avoiding touching your eyes, nose, and mouth with unwashed hands                                              | 0.211 ***                               | 0.187 ***   | 0.291 ***        |
| Use of disinfectants to clean hands when soap and water is not available for washing hands                    | 0.205 ***                               | 0.178 ***   | 0.316 ***        |
| To renounce social events                                                                                     | 0.165 ***                               | 0.151 ***   | 0.201 **         |
| Using antibiotics to prevent or treat the Corona virus                                                        | n.s.                                    | n.s.        | n.s.             |
| Wearing a face mask in public                                                                                 | 0.235 ***                               | 0.229 ***   | 0.210 **         |

|                                                                                                           |            |            |           |
|-----------------------------------------------------------------------------------------------------------|------------|------------|-----------|
| Social distancing in the public                                                                           | 0.204 ***  | 0.168 ***  | 0.319 *** |
| Disinfect superficies                                                                                     | 0.169 ***  | 0.150 ***  | 0.241 *** |
| Avoid direct contact with other people                                                                    | 0.112 **   | 0.089 *    | 0.158 *   |
| Open the window                                                                                           | 0.183 ***  | 0.185 ***  | 0.158 *   |
| <b>What is your position on the anti-COVID-19 vaccine?</b>                                                |            |            |           |
| I believe the vaccine can help contain the spread of COVID-19                                             | 0.063*     | n.s.       | 0.165**   |
| If I knew I was already infected with COVID-19, I would not get the vaccine                               | -0.088 **  | -0.082 **  | n.s.      |
| If everyone else is vaccinated against COVID-19, then I should not get vaccinated                         | -0.146 *** | -0.141 *** | -0.143 *  |
| If the vaccine was recommended for me, I would do it                                                      | 0.105 ***  | 0.089 **   | 0.142 *   |
| If your doctor recommended a COVID-19 vaccination, how likely would you be to get vaccinated?             | 0.090 **   | 0.065 *    | 0.182 **  |
| <b>Which of the following statements on COVID19 vaccination do you agree with?</b>                        |            |            |           |
| <b>...the COVID-19 vaccination is not necessary, because...</b>                                           |            |            |           |
| ...it is not effective                                                                                    | -0.072 **  | n.s.       | -0.183 ** |
| ...natural herd immunity is achieved with the spread of the virus and that's enough                       | -0.100 *** | -0.069 *   | -0.202 ** |
| ...this disease does not exist/ is a normal flu                                                           | -0.108 *** | -0.125 *** | n.s.      |
| ...the whole is just a profit for the pharmaceutical industry                                             | -0.108 *** | -0.087 **  | -0.173**  |
| <b>...the covid-19 vaccination is harmful, because,...</b>                                                |            |            |           |
| ...long-term risks are unknown                                                                            | -0.062 *   | -0.073 *   | n.s.      |
| ...new vaccines carry additional risks in the RNA                                                         | -0.111 *** | -0.099 **  | -0.113 *  |
| ...there are doctors who advise against it                                                                | -0.077 **  | n.s.       | -0.114 *  |
| ...an obligation to vaccinate certain groups with priority will lead to great socio-political discussions | n.s.       | n.s.       | n.s.      |

\*Spearman's rank correlation coefficient: altruism sum score against sample attribute defined on a 6-point Likert-scale responses.  $p$ -values < 0.001 are indicated with \*\*\*, < 0.01 with \*\*, < 0.05, \*, and  $p$ -values  $\geq 0.05$ , are regarded as not significant (n.s.)-
